# Supplementary material for: Polyether Ether Ketone Coated with Ultra-Thin Films of Titanium Oxide and Zirconium Oxide Fabricated by DC Magnetron Sputtering for Biomedical Application
Source: Materials (Basel). 2022 Nov 14;15(22):8029. doi: 10.3390/ma15228029 (PMC9694952; doi:10.3390/ma15228029)
Supplement: Supplementary file 1 [file materials-15-08029-s001.zip › materials-1990629-supplementary.pdf]

# **Support Information of: Polyether ether ketone coated with ultra-thin films of titanium oxide and zirconium oxide fabricated by DC magnetron sputtering for biomedical application**

**Igor O. Akimchenko<sup>1</sup>, Sven Rutkowski<sup>1,2,\*</sup>, Tuan-Hoang Tran<sup>1</sup>, Gleb E. Dubinenko<sup>1</sup>, Vsevolod I. Petrov<sup>2</sup>, Anna I. Kozelskaya<sup>1</sup>, Sergei I. Tverdokhlebov<sup>1,\*</sup>**

<sup>1</sup> Tomsk Polytechnic University, 30, Lenin Avenue, Tomsk, 634050, Russian Federation

<sup>2</sup> Tomsk Scientific Center of the Siberian Branch of the Russian Academy of Sciences, 10/4, Akademicheskii Prospekt, Tomsk, 634055, Russian Federation

\* Correspondence: rutkowski\_s@tpu.ru (S.R.), tverd@tpu.ru (S.I.T.)

# Supporting Figures:

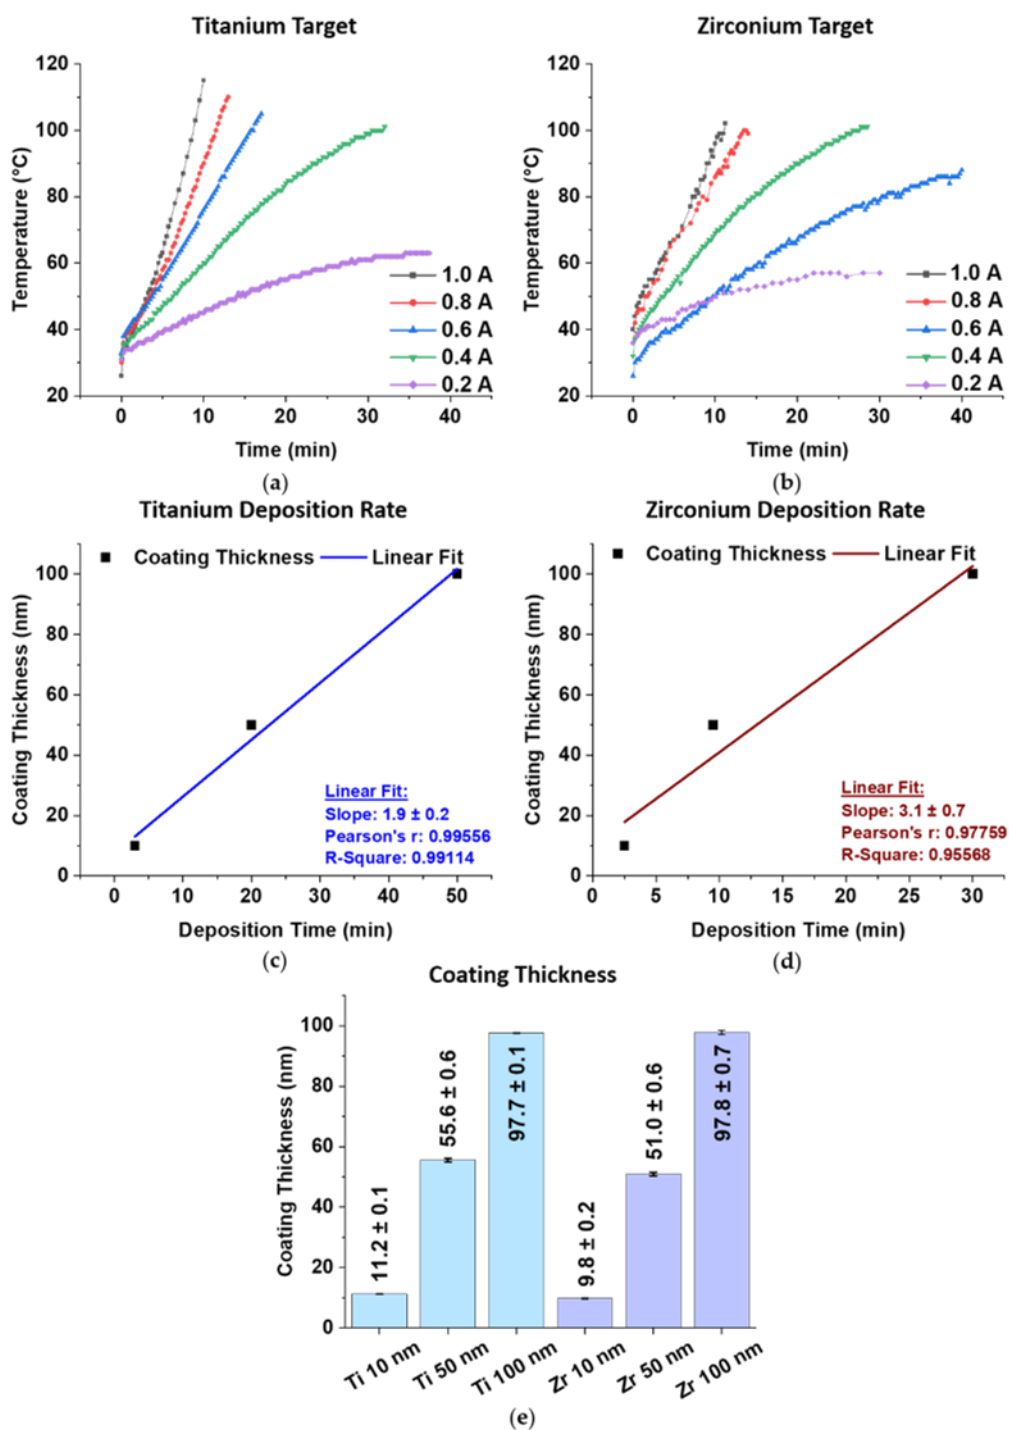

**Figure S1.** Relationship between sample holder temperature and DC magnetron sputtering time at current values from 0.2 A to 1.0 A for (a) Ti target and (b) Zr target. Obtained coating thickness for the applied deposition times for (c) Ti target and (d) Zr target. (e) Resulting coating thickness range determined by a spectral ellipsometer using Si wafers for magnetron sputtering.

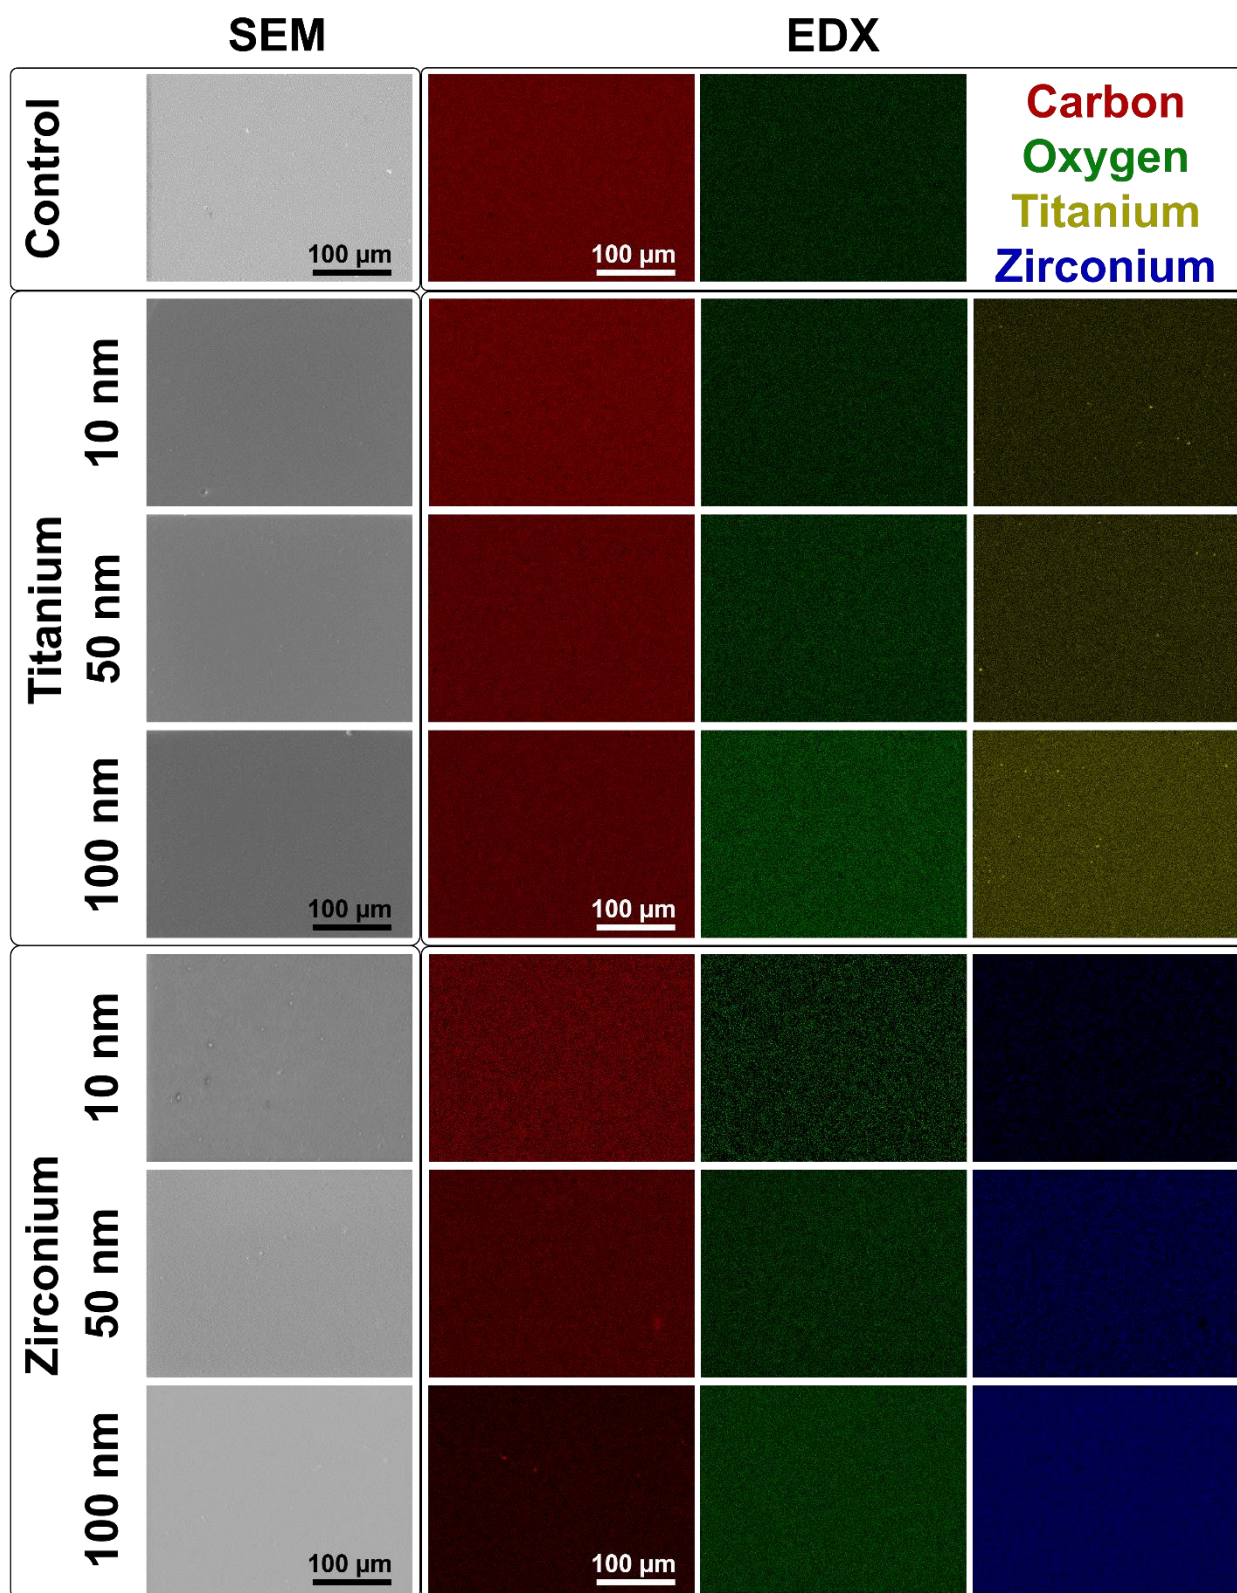

**Figure S2.** SEM and EDX mapping micrographs of the investigated PEEK sample coatings. Left column SEM micrographs; after that following columns are the EDX micrographs for the following elements: carbon (red), oxygen (green), titanium (yellow) and zirconium (blue/violet). The scale bar is 100  $\mu$ m for each micrograph.

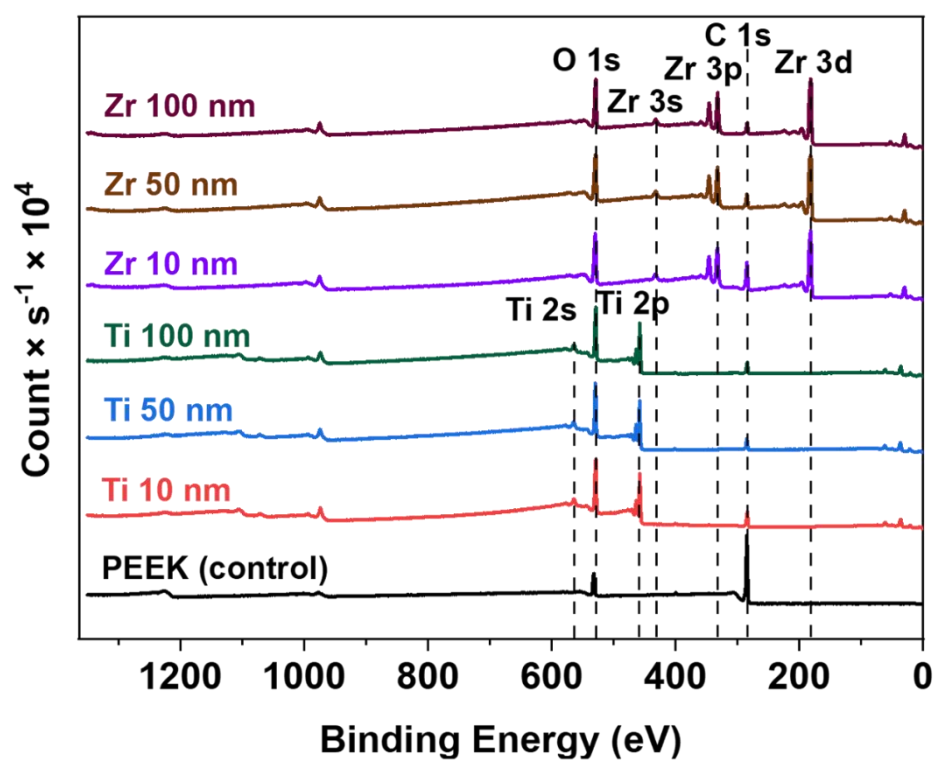

**Figure S3.** XPS survey spectra of all investigated PEEK samples.
